# Supplementary material for: Afatinib beyond progression in patients with non-small-cell lung cancer following chemotherapy, erlotinib/gefitinib and afatinib: phase III randomized LUX-Lung 5 trial
Source: PubMed Central journal article supplement — Ann Oncol. 2015 Dec 8;27(3):417–23. doi: 10.1093/annonc/mdv597 (PMC4769992; doi:10.1093/annonc/mdv597), 2015-12-08
Supplement: supp_mdv597_mdv597supp_data.pdf [file supp_mdv597_mdv597supp_data.pdf]

## Supplementary Figure Legends

**Supplementary Figure S1.** (A) Study design and (B) patient disposition. AE, adverse event; CR, complete response; PD, progressive disease; PR, partial response; RECIST, Response Evaluation Criteria in Solid Tumors; SD, stable disease.

### Primary efficacy end point – PFS across subgroups

**Supplementary Figure S2.** Forest plot of progression-free survival. CI, confidence interval; ECOG PS, Eastern Cooperative Oncology Group performance status; EGFR, epidermal growth factor receptor; HR, hazard ratio.

**Supplementary Figure S3.** Maximum percentage change from baseline in the size of the target lesions in the (A) afatinib plus paclitaxel arm and (B) investigator's choice of chemotherapy arm.

**Supplementary Figure S4.** Part A PFS (A) for all patients; (B) according to centrally determined *EGFR* mutation status; (C) according to clinical enrichment criteria; (D) according to tumor histology. EGFR, epidermal growth factor receptor; PFS, progression-free survival.

Median PFS during Part A was 3.2 months (supplementary Figure S4A). In patients subsequently randomized, median PFS was 5.6 months. Median PFS was higher in patients with centrally confirmed epidermal growth factor receptor (*EGFR*) mutations

than in patients with wild-type *EGFR* status (supplementary Figure S4B). PFS was also higher in patients who attained higher clinical enrichment criteria (complete response/partial response or  $\geq 48$  weeks of benefit on erlotinib/gefitinib) than those who did not (supplementary Figure S4C). PFS was similar in patients with squamous and adenocarcinoma histology (3.7 and 3.2 months, supplementary Figure S4D).

### **Post-progression therapy in patients who discontinued trial medication**

**Supplementary Figure S5.** Number of lines of subsequent therapy.

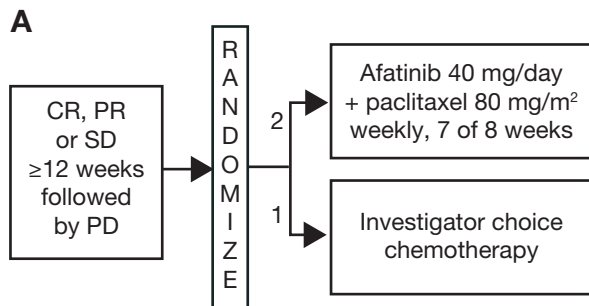

**B**

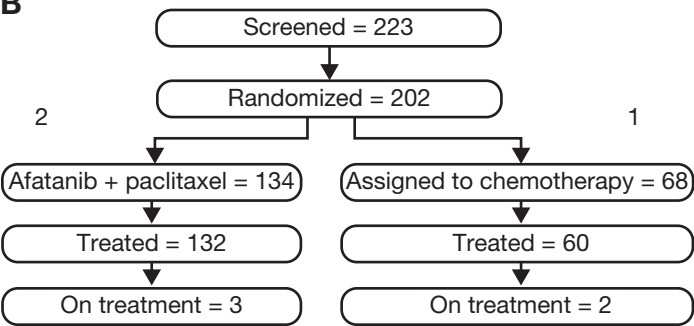

Reasons for discontinuation (%)

|                               | Afatinib + paclitaxel (n = 134) | Investigator choice (n = 68) |
|-------------------------------|---------------------------------|------------------------------|
| Progressive disease (RECIST)  | 54.5                            | 65.0                         |
| Clinical signs of progression | 8.3                             | 1.7                          |
| AE                            | 20.5                            | 13.3                         |
| Refusal                       | 9.1                             | 11.7                         |
| Other                         | 5.3                             | 5.0                          |

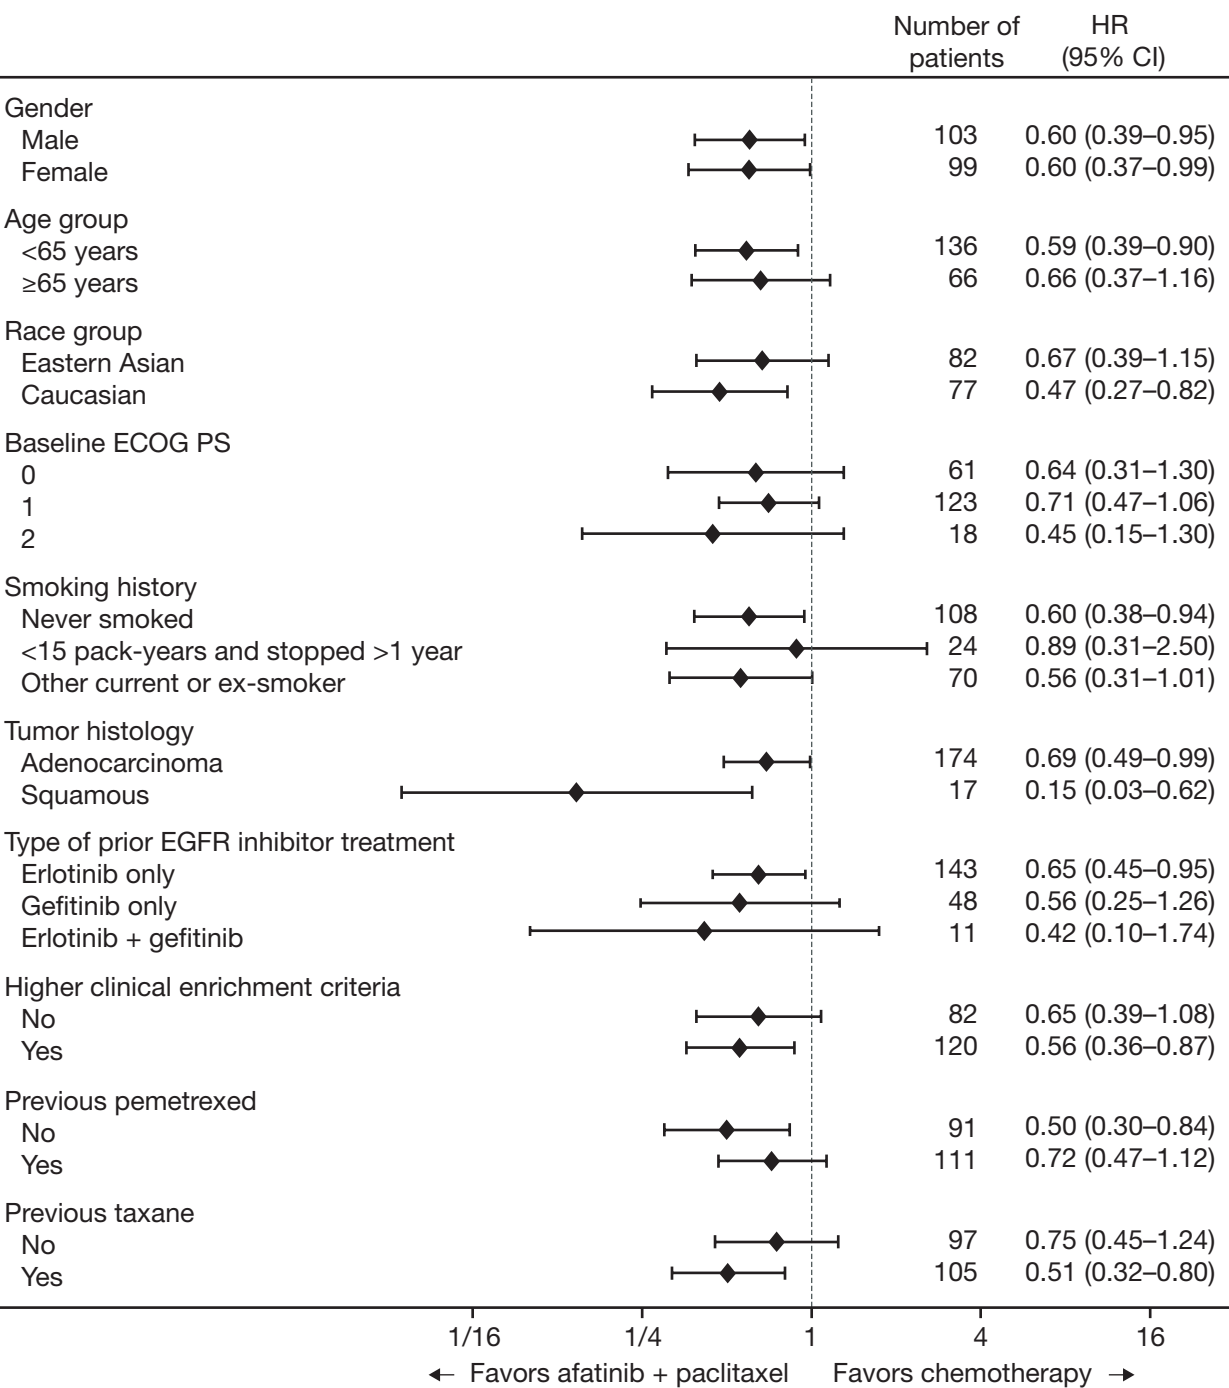

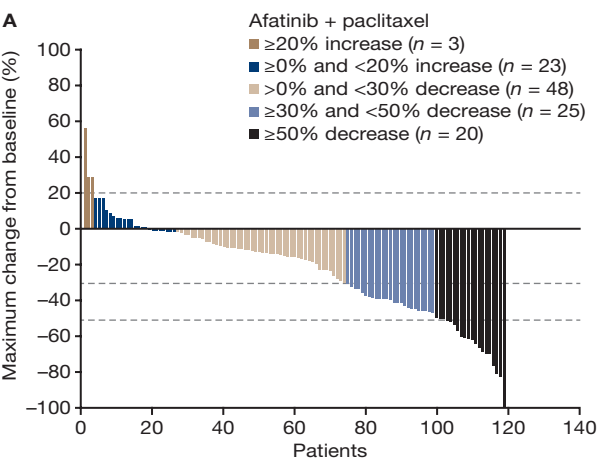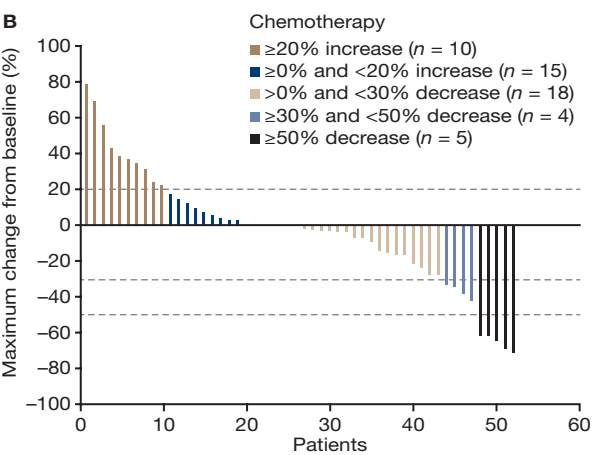

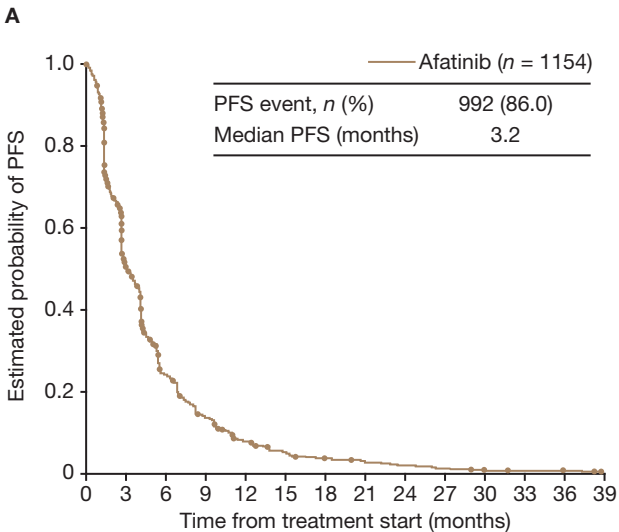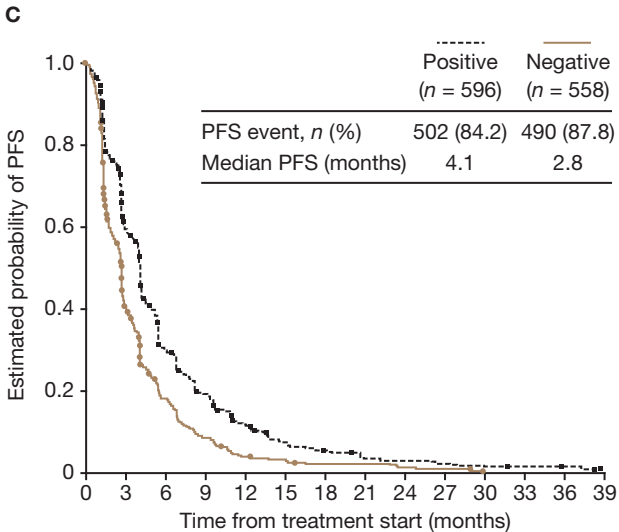

Number of patients at risk

|      |     |     |     |    |    |    |    |    |    |   |   |   |   |
|------|-----|-----|-----|----|----|----|----|----|----|---|---|---|---|
| 1154 | 517 | 229 | 130 | 70 | 44 | 29 | 21 | 15 | 11 | 5 | 4 | 3 | 0 |
|------|-----|-----|-----|----|----|----|----|----|----|---|---|---|---|

Number of patients at risk

|     |     |     |     |    |    |    |    |    |    |   |   |   |   |   |
|-----|-----|-----|-----|----|----|----|----|----|----|---|---|---|---|---|
| No  | 558 | 203 | 82  | 38 | 18 | 13 | 8  | 8  | 4  | 3 | 0 | 0 | 0 | 0 |
| Yes | 596 | 314 | 147 | 92 | 52 | 31 | 21 | 13 | 11 | 8 | 5 | 4 | 3 | 0 |

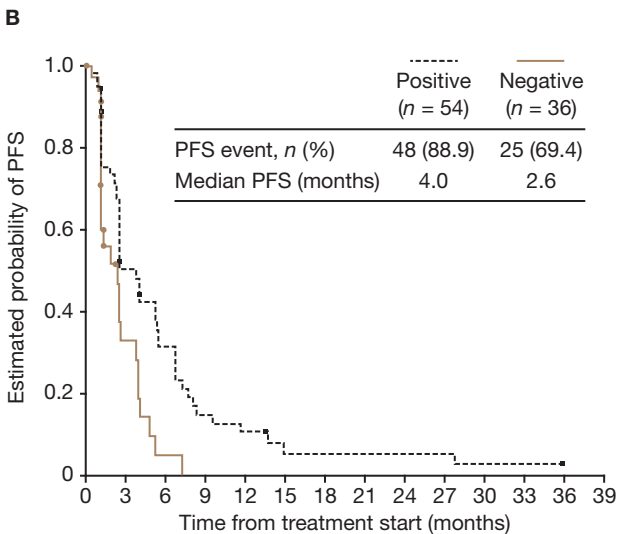

Number of patients at risk

|          |    |    |    |   |   |   |   |   |   |   |   |   |   |   |
|----------|----|----|----|---|---|---|---|---|---|---|---|---|---|---|
| Negative | 36 | 7  | 1  | 0 | 0 | 0 | 0 | 0 | 0 | 0 | 0 | 0 | 0 | 0 |
| Positive | 54 | 25 | 15 | 7 | 5 | 3 | 2 | 2 | 2 | 2 | 1 | 1 | 0 | 0 |

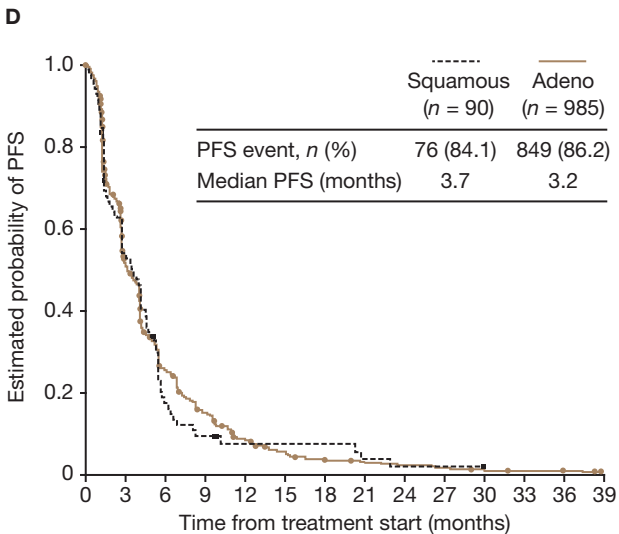

Number of patients at risk

|         |     |     |     |     |    |    |    |    |    |    |   |   |   |   |
|---------|-----|-----|-----|-----|----|----|----|----|----|----|---|---|---|---|
| Group 1 | 985 | 448 | 205 | 120 | 64 | 38 | 23 | 19 | 14 | 10 | 5 | 4 | 3 | 0 |
| Group 2 | 90  | 43  | 13  | 7   | 4  | 4  | 4  | 4  | 2  | 1  | 1 | 0 | 0 | 0 |

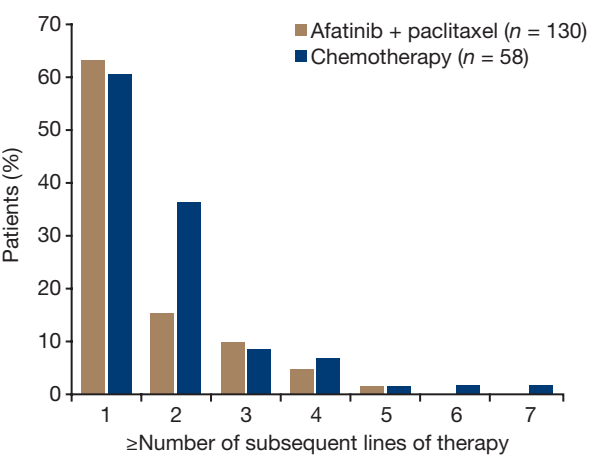

### **Supplementary Methods S1. Assessments of quality of life (QoL)**

QoL was measured with EQ-5D health status self-assessment questionnaire; European Organisation for Research and Treatment of Cancer Quality of Life Questionnaire C30 (EORTC QLQ-C30); EORTC lung cancer-specific supplementary module (QLQ-LC13). Cough (Q1 of QLQ-LC13), dyspnea (Q3 and Q5 of QLQ-LC13), and pain (Q9 and Q19 of QLQ-C30) were assessed per standard published EORTC algorithms. Time-to-deterioration was defined as time from randomization to first 10-point worsening from baseline score.
